# Supplementary material
Source: publisher site journal article supplement (https://www.dovepress.com/get_supplementary_file.php?f=425787.docx)
Supplement: Supplementary file 1 [file get_supplementary_file.php]

Table S1

Table S1 Holt-Winter models effectiveness, test and fitting results

| **Models** | **Parameter** | | |  | **Fit evaluation** | | | | |  | ***P***  **(Ljung-Box Q test)** |
| --- | --- | --- | --- | --- | --- | --- | --- | --- | --- | --- | --- |
| ***α*** | ***β*** | ***γ*** |  | **R2** | **BIC** | **RMSE** | **MAPE (%)** | **MAE** |
| *Simple seasonal model | 0.900 | - | 0.000 |  | 0.841 | -5.771 | 0.052 | 0.915 | 0.036 |  | 0.107 |
| Addition model | 0.904 | 0.000 | 0.000 |  | 0.838 | -5.668 | 0.053 | 0.914 | 0.036 |  | 0.121 |
| Multiplication model | 0.801 | 0.000 | 1.000 |  | 0.786 | -5.386 | 0.061 | 1.059 | 0.042 |  | 0.379 |
| *Note: * The optimal model* | | | | | | | | | | | |

Table S2

Table S2 ARIMA models effectiveness, test and fitting results

| **Models** | **Fit evaluation** | | | | | ***P***  **(Ljung-Box Q test)** |
| --- | --- | --- | --- | --- | --- | --- |
| **R2** | **BIC** | **RMSE** | **MAPE (%)** | **MAE** |
| ARIMA (2,1,2) (1,1,1)12 | 0.791 | -4.845 | 0.067 | 1.209 | 0.048 | 0.345 |
| ARIMA (0,1,0) (0,1,0)12 | 0.581 | -4.784 | 0.088 | 1.634 | 0.065 | 0.003 |
| ARIMA (1,1,0) (1,1,0)12 | 0.760 | -5.133 | 0.068 | 1.251 | 0.049 | 0.230 |
| ARIMA (0,1,1) (0,1,1)12 | 0.738 | -5.043 | 0.071 | 1.301 | 0.051 | 0.125 |
| ARIMA (1,1,0) (0,1,0)12 | 0.582 | -4.680 | 0.089 | 1.628 | 0.064 | 0.002 |
| ARIMA (1,1,0) (1,1,1)12 | 0.768 | -5.061 | 0.068 | 1.211 | 0.048 | 0.305 |
| ARIMA (1,1,0) (0,1,1)12 | 0.737 | -5.038 | 0.071 | 1.309 | 0.052 | 0.114 |
| *ARIMA (0,1,0) (1,1,0)12 | 0.755 | -5.217 | 0.068 | 1.295 | 0.051 | 0.204 |
| ARIMA (0,1,0) (1,1,1)12 | 0.764 | -5.147 | 0.067 | 1.256 | 0.049 | 0.252 |
| ARIMA (0,1,0) (0,1,1)12 | 0.742 | -5.165 | 0.070 | 1.299 | 0.051 | 0.260 |
| ARIMA (0,1,1) (1,1,0)12 | 0.762 | -5.140 | 0.068 | 1.237 | 0.049 | 0.324 |
| ARIMA (1,1,1) (1,1,0)12 | 0.784 | -5.134 | 0.065 | 1.234 | 0.048 | 0.431 |
| *Note: * The optimal model* | | | | | | |
